# Supplementary material for: 2,6-Bis(styryl)anthracene derivatives with large two-photon cross-sectionsElectronic supplementary information (ESI) available: synthesis details; measurement of two-photon cross-sections. See http://www.rsc.org/suppdata/cc/b3/b309124d/
Source: Royal Society of Chemistry journal article supplement (doi:10.1039/b309124d), 2003-01-01
Supplement: b309124d.doc [file b309124d.doc]

**Supplementary** **Information**

## 2,6-Bis(styryl)anthracene derivatives with large two-photon cross-sections

Wen Jun Yang, Dae Young Kim, Mi-Yun Jeong, Hwan Myung Kim, Seung-Joon Jeon, and Bong Rae Cho*

Molecular Opto-Electronics Laboratory, Department of Chemistry and Center for Electro- and Photo-Responsive Molecules, Korea University, Seoul 136-701, Korea, chobr@korea.ac.kr

**Synthesis of 2,6-bis(styryl)anthracene derivatives.**

***2,6-Dimethyl-9,10-di(p-cyanophenyl)anthracene* (B).** 13.5 mL of butyllithium (1.6 M in hexanes, 21.6 mmol) was added to a two-neck flask containing anhydrous THF (40 mL) under argon. After cooling the solution to -78 oCand a solution of *p*-cyanobromobenzene (4.63 g, 25.42 mmol) in 20 mL THF was added by using a syringe. The solution was stirred for 1 hr and 2,6-dimethylanthraquinone (**A**)1 (2.0 g, 8.47 mmol in 40 mL THF) was slowly added. The mixture was stirred for 1 hr at -78 oCand for 4 hr at RT, poured into water, and extracted with dichloromethane. The solvent was evaporated and acetic acid (80 mL) was added. The resulting solution was heated to 120 oC and zinc powder (6.0 g) was added in small portions for 30 min. After continuous stirring for 3 hr at that temperature, the mixture was cooled to RT, poured into water, and extracted with dichloromethane. The solvent was evaporated and the residue was separated by column chromatography on silica gel using a hexane/dichloromethane (1:1) as the eluent. Yield 1.9 g (56 %); Mp >300 °C; 1H NMR (300 MHz, CDCl3): d 7.93 (d, 4H, *J* = 9.0 Hz), 7.58 (d, 4H, *J* = 9.0 Hz), 7.42 (d, 2H, *J* = 9.0 Hz), 7.25 (s, 2H), 7.20 (d, 2H, *J* = 9.0 Hz), 2.40 (s, 6H).

***2,6-Dimethylanthracene* (C).** Aluminum powder (8.5 g, 0.31 mol), mercury chloride (0.17g, 0.63 mmol), cyclohexanol (250 mL), carbon tetrachloride (1.7 mL) were added to a two-neck flask with a condenser under argon, the resulting mixture was heated for 4 hr at 85 oC and then for 12 hr at 160 oC. 2,6-Dimethylanthraquinone (6.0 g, 25 mmol) was added to the flask and the mixture was refluxed for 48 hr. The solvent was removed by reduced pressure distillation, and the residue was separated by column chromatography on silica gel using a hexane/dichloromethane (20:1) as the eluent. Yield 3.8 g (73 %); Mp 235-237 °C; 1H NMR (300 MHz, CDCl3): d 8.24 (s, 2H), 7.86 (d, 2H, *J* = 9.0 Hz), 7.71 (s, 2H), 7.25 (d, 2H, *J* = 9.0 Hz), 2.52 (s, 6H).

***Dimethyl-9,10-dibromoanthracene.*** Bromine (1.1 mL, 21 mmol) was slowly added by dropping funnel into a solution of 2,6-dimethylanthracene (2.0 g, 9.7 mmol) in CCl4 (200 mL) at 0 oC. After the solution was stirred for 5 hr at 0 oC, 50 mL of 20% aqueous sodium hydrosulfite was added. Organic layer was separated and washed with water, and the solvent was evaporated to obtain 2,6-dimethyl-9,10-dibromoanthracene. Yield 3.2 g (91%); Mp 188-190 °C; 1H NMR (300 MHz, CDCl3): d 8.44 (d, 2H, *J* = 9.0 Hz), 8.29 (s, 2H), 7.42 (d, 2H, *J* = 9.0 Hz), 2.61 (s, 6H).

***2,6-Dimethyl-9,10-dicyanoanthracene (D).*** 2,6-Dimethyl-9,10-dibromoanthracene (1.8 g, 5.0 mmol), pyridine (4.0 mL), cuprous cyanide (0.98 g, 11 mmol) were added to a pressure tube with a plunger valve and a magnetic bar under protection of argon, the tube was heated at 220 oC for 4h. The mixture was cooled to room temperature and then poured with vigorous stirring into methanol. The precipitate that formed was collected on a filter paper and washed with methanol. The crude product was separated by column chromatography on silica gel using dichloromethane as the eluent. Yield 1.1 g (82 %); Mp 292-294 °C; 1H NMR (300 MHz, CDCl3, ppm): d 8.36 (d, 2H, *J* = 9.0 Hz), 8.22 (s, 2H), 7.64 (d, 2H, *J* = 9.0 Hz), 2.67 (s, 6H).

***2,6-Bis(diethylphosphorylmethyl)anthracene (E1).*** A mixture of 2,6-dimethylanthracene (1.5 g, 7.3 mmol), NBS (2.7 g, 15 mmol), and benzoyl peroxide (71 mg, 0.29 mmol) in benzene (100 mL) was refluxed for 3 hr. The mixture was poured into methanol, and the precipitate that collected was dried by vacuum. This intermediate was added to triethyl phosphate (50 mL), and the resulting solution was refluxed for 12 hr. The solvent was removed by in vacuo, the residue was purified by column chromatography on silica gel using a ethyl acetate/dichloromethane (2:1) as the eluent. Yield 1.9 g (53 %); Mp 140-142 °C; 1H NMR (300 MHz, CDCl3): d 8.34 (s, 2H), 7.96 (d, 2H, *J* = 9.0 Hz), 7.88 (s, 2H), 7.44 (d, 2H, J=9.0 Hz), 4.04 (m, 8H), 3.36 (d, 4H, *J* = 21 Hz), 1.25 (t, 12H, *J* = 7.5 Hz).

***2,6-Bis(diethylphosphorylmethyl)-9,10-dicyanoanthracene (E2).*** Synthesized by the same procedure as described for **E1** except that 2,6-dimethyl-9,10-dicyanoanthracene was used. Yield 44 %. Mp >300 °C; 1H NMR (300 MHz, CDCl3): d 8.46 (d, 2H, *J* = 9.0 Hz), 8.35 (s, 2H), 7.83 (d, 2H, *J* = 9.0 Hz), 4.10 (m, 8H), 3.45 (d, 4H, *J* = 24 Hz), 1.30 (t, 12H, *J* = 7.5 Hz).

***2,6-Bis(diethylphosphorylmethyl)-9,10-bis(p-cyanophenyl)anthracene (E3).*** Synthesized by the same procedure as described for **E1** except that 2,6-dimethyl-9,10-di(*p*-cyanophenyl)anthracene was used. Yield 49 %; Mp >300 °C; 1H NMR (300 MHz, CDCl3): d 7.94 (d, 4H, *J* = 9.0 Hz), 7.59 (d, 4H, *J* = 8.5 Hz), 7.50 (d, 2H, *J* = 9.0 Hz), 7.40 (s, 2H), 7.35 (d, 2H, *J* = 9Hz), 3.99 (m, 8H), 3.19 (d, 4H, *J* = 24 Hz), 1.21 (t, 12H, *J* = 7.5 Hz).

***2,6-Bis(4-dihexylaminostyryl)anthracene (1a).*** LDA (1.5 M in cyclohexane) (0.34 mL, 0.51 mmol) was added dropwise to a stirred solution of ***E1*** (100 mg, 0.21 mmol) in anhydrous THF (15 mL) at -78 oCunder argon. The mixture was stirred for 1 hr and then 4-(*N,N*-dihexylamino)benzaldehyde (150 mg, 0.52 mmol) in THF (5 mL) was added dropwise over a period of 10 min. After the mixture was stirred for 2 hr at -78 oCand for 6 hr at room temperature, 1 mL of water was added and the solvent was evaporated. The residue was dissolved into dichloromethane and washed several times with water. The solvent was evaporated and the crude product was separated by column chromatography on silica gel using a hexane/dichloromethane (3:1¾1:1) as the eluent. Yield 58 mg (37 %); Mp 182-184 °C; 1H NMR (300 MHz, CDCl3): d 8.27 (s, 2H), 7.92 (d, 2H, *J* = 9.0 Hz), 7.85 (s, 2H), 7.74 (d, 2H, *J* = 9.0 Hz), 7.44 (d, 4H, *J* = 7.5 Hz), 7.18 (d, 2H, *J* = 16.5 Hz), 7.08 (d, 2H, *J* = 16.5 Hz), 6.65 (d, 4H, *J* = 7.5 Hz), 3.30 (t, 8H, *J* = 7.5 Hz), 1.61 (m, 8H), 1.31 (m, 24H), 0.92 (t, 12H, *J* = 6.0 Hz). 13C NMR (75 MHz, CDCl3): d 148.09, 135.31, 132.23, 131.65, 129.40, 128.52, 128.09, 125.86, 124.79, 124.12, 123.42, 111.88, 100.17, 51.33, 31.98, 27.55, 27.10, 22.94, 14.30. Anal. Calcd for C54H72N2: C, 86.57; H, 9.69; N, 3.74. Found: C, 86.59; H, 9.68; N, 3.68.

***2,6-Bis(4-di(4-tert-butyl)phenylaminostyryl)anthracene (1b).*** Synthesized by the same procedure as described for **1a** except that **E1** and 4-[*N,N*-(4-*tert*-butylphenyl)amino]benzaldehyde was used. Yield, 56 %; Mp >300 °C; 1H NMR (300 MHz, CDCl3): d 8.28 (s, 2H), 7.92 (d, 2H, *J* = 9.0 Hz), 7.88 (s, 2H), 7.73 (d, 2H, *J* = 9.0 Hz), 7.42 (d, 4H, *J* = 9.0 Hz), 7.28 (d, 8H, *J* = 9.0 Hz), 7.18 (m, 4H), 7.06 (d, 12H, *J* = 9.0 Hz), 1.32 (s, 36H). 13C NMR (75 MHz, CDCl3): d 148.04, 146.16, 145.00, 134.89, 132.24, 131.78, 130.88, 128.88, 128.71, 127.52, 126.91, 126.77, 126.31, 126.19, 124.41, 123.34, 122.85, 34.56, 31.68. Anal. Calcd for C70H72N2: C, 89.31; H, 7.71; N, 2.98. Found: C, 89.24; H, 7.82; N, 2.94.

***2,6-Bis(4-dihexylaminostyryl)-9,10-dicyanoanthracene (2a).*** Synthesized by the same procedure as described for **1a** except that ***E2*** and 4-(*N,N*-dihexylamino)benzaldehyde were used. Yield, 51 %; Mp 208-210 °C. 1H NMR (300 MHz, CDCl3): d 8.26 (d, 2H, *J* = 9.0 Hz), 8.10 (s, 2H), 7.94 (d, 2H, *J* = 9.0 Hz), 7.42 (d, 4H, *J* = 9.0 Hz), 7.24 (d, 2H, *J* = 15 Hz), 7.00 (d, 2H, J = 15 Hz), 6.62 (d, 4H, *J* = 9.0 Hz), 3.29 (t, 8H, *J* = 7.5 Hz), 1.61 (m, 8H), 1.34 (m, 24H), 0.92 (t, 12H, *J* = 6.0 Hz). 13C NMR (75 MHz, CDCl3): d 149.18, 145.65, 136.15, 132.69, 132.12, 130.56, 129.38, 128.76, 126.21, 125.04, 124.65 123.77, 112.65, 101.45, 51.25, 31.93, 27.44, 27.03, 22.91, 14.30. Anal. Calcd for C56H70N4: C, 84.16; H, 8.83; N, 7.01. Found: C, 83.94; H, 8.66; N, 6.90.

***2,6-Bis(4-di(4-tert-butylphenyl)aminostyryl)-9,10-dicyanoanthracene(2b).*** Synthesized by the same procedure as described for **1a** except that ***E3*** and 4-[*N,N*-(4-*tert*-butylphenyl)amino]benzaldehyde were used. Yield, 44 %; Mp >300 °C; 1H NMR (300 MHz, CDCl3): d 8.34 (d, 2H, *J* = 9.0 Hz), 8.21 (s, 2H), 8.00 (d, 2H, *J* = 9.0Hz), 7.43 (d, 4H, *J* = 7.5 Hz), 7.30 (d, 8H, *J* = 7.5 Hz), 7.16 (m, 4H), 7.06 (d, 12H, *J* = 7.5 Hz), 1.34 (s, 36H). 13C NMR (75 MHz, CDCl3): d 149.05, 146.69, 139.16, 132.40, 132.23, 129.34, 128.13, 127.94, 126.43, 126.34, 124.87, 124.53, 123.04, 121.99, 116.88, 114.26, 110.10, 106.90, 34.60, 31.67. Anal. Calcd for C72H70N4: C, 87.23; H, 7.12; N, 5.65. Found: C, 87.27; H, 7.15; N, 5.58.

***2,6-Bis(4-dihexylaminostyryl)-9,10-bis(4-cyanophenyl)anthracene (3a).*** Synthesized by the same procedure as described for **1a** except that ***E3*** and 4-(*N,N*-dihexylamino)benzaldehyde were used. Yield, 44 %; Mp 244-242 °C; 1H NMR (300 MHz, CDCl3): d 7.96 (d, 4H, *J* = 9.0 Hz), 7.65 (d, 2H, *J* = 9.0 Hz), 7.62 (d, 4H, *J* = 9.0 Hz), 7.44 (d, 2H, *J* = 9.0 Hz), 7.36 (d, 4H, *J* = 9.0 Hz), 7.30 (s, 2H), 7.02 (d, 2H, *J* = 16.5 Hz), 6.86 (d, 2H, *J* = 16.5 Hz), 6.58 (d, 4H, *J* = 9.0 Hz), 3.27 (t, 8H, *J* = 6.5 Hz), 1.58 (m, 8H), 1.31 (m, 24H), 0.90 (t, 12H, *J* = 6.0 Hz). 13C NMR (75 MHz, CDCl3, ppm): d 148.27, 144.48, 135.77, 135.05, 132.67, 132.49, 130.35, 129.86, 129.18, 128.23, 126.62, 124.19, 123.99, 123.56, 123.34, 119.21, 111.96, 111.75, 51.27, 31.95, 27.49, 27.05, 22.92, 14.30. Anal. Calcd for C72H70N4: C, 87.23; H, 7.12; N, 5.65. Found: C, 87.31; H, 7.13; N, 5.56.

***2,6-Bis(4-diphenylaminostyryl)-9,10-bis(4-cyanophenyl)anthracene (3b’).*** Synthesized by the same procedure as described for **1a** except that ***E3*** and 4-(*N,N*-diphenylamino)benzaldehyde were used. Yield, 44 %; Mp >300 °C; 1H NMR (300 MHz, CDCl3): d 7.94 (d, 6H, *J* = 9.0 Hz), 7.80 (d, 6H, *J* = 9.0 Hz), 7.74 (d, 6H, *J* = 9.0 Hz), 7.62 (d, 6H, *J* = 9.0 Hz), 7.56 (s, 3H), 7.48 (d, 6H, *J* = 9.0 Hz), 7.22 (d, 3H, *J* = 15 Hz), 7.14 (d, 6H, *J* = 9.0 Hz), 7.06 (d, 3H, *J* = 15 HZ). Anal. Calcd for C72H70N4: C, 87.23; H, 7.12; N, 5.65. Found: C, 87.38; H, 7.04; N, 5.58.

##### Measurement of two-photon cross section.

The two-photon absorption cross-section of the octupolar compounds has been measured with the two-photon-induced fluorescence method by using the nano-second laser pulses as described.2-5 The same OPO laser as described above has been used as the excitation source.

Samples were dissolved in toluene at concentrations of 1.0 ´ 10-5 M and the two-photon induced fluorescence intensity was measured at 750-1050 nm by using fluorescein (8 ´ 10-5 M in water, pH = 11), coumarin 307 (1 ´ 10-5 M in MeOH), and rhodamine B (1 ´ 10-5 M in MeOH) as the reference.4 The intensities of the two-photon induced fluorescence spectra of the reference and sample emitted at the same excitation wavelength were determined. The TPA cross section, measured by using the two-photon-induced fluorescence measurement technique, can be measured by using the following equation,

where the subscripts *s* and *r* stand for the sample and reference molecules.3 The intensity of the signal collected by a PMT detector was denoted as S. F is the fluorescence quantum yield. f is the overall fluorescence collection efficiency of the experimental apparatus. The number density of the molecules in solution was denoted as c. is the TPA cross section of the reference molecule.

The normalized one-photon absorption, emission, and two-photon excitation spectra for **1**-**3** are depicted in Figure S1.

Figure S1. Normalized one-photon emission (▲), absorption (■) spectra and two-photon

excitation spectrum (●) for **1**-**3** in toluene. The excitation wavelengths for the emission spectra are 455 nm (**1a**), 454 nm (**1b**), 587 nm (**2a**), 566 nm (**2b**), and 474 nm (**3b’**), respectively. The two-photon spectra are plotted as a function of total transition energy (twice the photon energy).

# **References**

1. H. A. Staab and M. Sauer, *Liebigs Ann. Chem*. 1984, 752.
2. J. N. Demas, G. A. Crosby, *J. Phys. Chem.* 1971, 75, 991.
3. M. Rumi, J. E. Ehrlich, A. A. Heikal, J. W. Perry, S. Barlow, Z. Hu, D. McCord-Maughon, T. C. Parker, H. Röckel, S. Thayumanavan, S. R. Marder, D. Beljonne, J.-L. Brédas, *J.* *Am. Chem. Soc.* 2000, 122, 9500.

(4) C. Xu, W. W. Webb, *J. Opt. Soc. Am. B*, 1996, 13, 481.

(5) B. R. Cho, K. H. Son, S. H. Lee, Y.-S. Song, Y.-K. Lee, S.-J. Jeon, J.-H. Choi, H. Lee, M. Cho, *J. Am. Chem. Soc.* 2001, 123, 10039.
